# Supplementary material
Source: publisher figshare collection journal article supplement (https://rs.figshare.com/ndownloader/files/14561081)
Supplement: Supplementary file 1 [file 14561081]

## Sheet: Metadata
Supplementary data for Toxopeus, Koštál & Sinclair 'Evidence for non-colligative function of small cryoprotectants in a freeze-tolerant insect'
Haemolymph and Fat body Sheets
Fifth instar male G. veletis were isolated into individual containers, and either maintained under rearing (control) conditions, or transferred to acclimation conditions that induce freeze tolerance.
Datasheets contain concentrations of metabolites in samples of G. veletis haemolymph (mM) and fat body tissue (nmol/mg tissue) extracted from the crickets 2 h, 3 weeks, or 6 weeks after isolation.
Each biological replicate contained haemolymph or fat body from five crickets.
Treatment	Description
0 weeks control	Rearing conditions, 2 h post-isolation
3 weeks control	Rearing conditions, 3 weeks post-isolation
6 weeks control	Rearing conditions, 6 weeks post-isolation
3 weeks acclimation	Acclimation conditions, 3 weeks post-isolation
6 weeks acclimation	Acclimation conditions, 6 weeks post-isolation

## Sheet: Haemolymph
Treatment	Replicate	Arginine	Glutamine	Serine	Asparagine	Threonine	Alanine	Putrescine	Aspartic acid	Ornithine	Proline	Glutamic acid	Methionine	Histidine	Glutathion (GSH)	Cysteine	Cystathione (CTH)	Tryptophan	Phenylalanin	Tyrosine	Lysine	Fumaric acid	Succinic acid	Lactic acid	Maleic acid	Glycine	Aminobutyric acid	Valine	beta-Alanine	Ketoglutaric acid	Leucine	Isoleucine	Malic acid	Aconitic acid	Myristic acid (C14:0)	Citric acid	Palmitic acid (C16:0)	Stearic acid (C18:0)	Oleic acid (C18:1n9)	Linoleic acid (C18:2n6)	Pyruvic acid	Glycerol	Threitol	Ribose	Ribitol	Fructose	Glucose	chiro-Inositol	scyllo-Inositol
0 weeks control	1	0.915867	2.63044	0.859235	0.587557	0.563146	1.17254	0.0292148	0.103171	0.041058	4.338	0.184312	0.229702	0.100377	0.248045	0.0556924	0.0300188	0.112279	0.379601	1.37198	1.25919	0.0993784	0.169743	2.54209	0.0913202	2.38321	0	0.924327	0.0410822	0.612273	0.529845	0.455538	0.100991	0.147869	0.716516	0.930166	0.436691	0.254002	0.0934043	-0.014794	0.553006	0.485	0.245	0	0	0.575	1.575	1.01	0.86
0 weeks control	2	1.10777	1.63134	1.47726	0.463491	0.369817	0.650287	0.0183351	0.0456535	0.0193216	3.79461	0.130858	0.206433	0.00657553	0.13271	0.0297266	0.0128446	0.141894	0.563284	1.70282	1.21387	0.0580401	0.145195	0.461841	0.0514249	1.83089	0	0.640305	0.043269	0.661105	0.493678	0.422995	0.0697468	0.154793	0.325183	1.26831	0.161696	0.139084	0.0590928	0.0391982	0.216198	0.174286	0.202857	0	0	0.254286	1.54286	0.297143	0.277143
0 weeks control	3	1.25569	2.82713	1.28237	0.512897	0.42732	0.492433	0.0295103	0.0575884	0.0222517	4.37261	0.16941	0.171009	0.0183464	0.206161	0.0436821	0.00568284	0.161437	0.482945	1.62744	1.15579	0.044548	0.0709061	0.992602	0.0586606	1.95081	0	0.931616	0.0286277	0.516289	0.59275	0.433023	0.0875199	0.142206	0.236154	1.21972	0.203454	0.204215	0.0792333	0.0608348	0.36887	0.4	0.236	0	0	0.152	1.6	0.3	0.172
3 weeks control	1	1.83946	1.93142	0.987629	0.412479	0.460033	1.69719	0.0399338	0.0615033	0.0272498	4.61912	0.197234	0.173415	0.145539	0.214999	0.0625391	0.0169907	0.146942	0.357518	1.14274	1.29676	0.131351	0.0966128	1.81769	0.0822211	3.45762	0	0.962041	0.055399	0.639494	0.73998	0.637982	0.0925932	0.211672	0.180465	1.30922	0.230605	0.227968	0.113851	0.145698	0.721883	0.186667	0.223333	0	0	0.353333	3.21667	1.56333	7.75
3 weeks control	2	0.714733	1.62034	0.748405	0.233675	0.278829	0.552781	0.0227142	0.0360223	0.0154574	3.35686	0.116168	0.0728659	0.0893033	0.148507	0.044681	0.0037937	0.136385	0.320149	1.41902	0.752277	0.038005	0.0544529	0.528079	0.049054	1.7052	0	0.809905	0	0.449432	0.484842	0.384181	0.0475242	0.141305	0.157872	0.917828	0.182147	0.210972	0.082129	0.0121819	0.228442	0.313333	0.183333	0	0	0	0.403333	0.453333	0.696667
3 weeks control	3	0.835459	2.57263	0.733011	0.385356	0.35006	0.684961	0.0190667	0.0384822	0.0221555	2.81874	0.111373	0.138107	0.0714409	0.146805	0.0673008	0.0106135	0.167324	0.309813	1.15103	1.35079	0.0594036	0.0936253	0.529399	0.0570831	2.62647	0	0.824756	0	0.488763	0.570186	0.427156	0.0518438	0.136054	0.169377	0.975874	0.182996	0.234344	0.0881997	0.00407625	0.236687	0.1	0.2	0	0	0.133333	0.406667	0.51	0.836667
6 weeks control	1	1.47302	7.24902	1.02211	0.541046	0.595603	1.3601	0.0450648	0.0350881	0.0224772	8.18079	0.132228	0.198788	0.281432	0.14895	0.0599602	0.00441491	0.174242	0.857486	3.78287	0.917489	0.168911	0.206056	0.318644	0.0929794	4.36683	0.0145099	2.00846	0.0715521	0.825957	1.02054	0.820505	0.0616461	0.3856	0.117846	2.80158	0.0960036	0.132974	0.049312	0.00905143	0.239659	0.1575	0.235	0	0	0	0.4075	0.435	0.8725
6 weeks control	2	1.53018	3.38753	0.72127	0.485337	0.789904	0.985106	0.0400393	0.0563717	0.0300359	5.98856	0.154214	0.267499	0.285335	0.130111	0.068921	0.0413337	0.292981	0.54741	1.9047	1.401	0.08809	0.210849	0.711031	0.0580827	3.66776	0.0162774	1.46223	0.0607422	0.983355	0.869714	0.794073	0.120048	0.213116	0.105469	1.44349	0.221466	0.312946	0.158736	0.247243	0.321203	0.2975	0.27	0	0	0.865	4.1175	1.3775	2.5575
6 weeks control	3	1.2412	2.18896	1.5134	0.362909	0.383631	0.942615	0.0645774	0.0651276	0.0287502	6.1394	0.342913	0.110771	0.254767	0.312361	0.064794	0.0035777	0.202825	0.469218	2.56285	1.28235	0.0372189	0.0733294	0.434099	0.068626	2.45737	0	0.97154	0	0.615627	0.68547	0.529838	0.0768833	0.248598	0.233678	2.48824	0.169577	0.240413	0.103985	0.0699421	0.463704	0.225	0.305	0	0	0	0.465	0.44	0.24
3 weeks acclimated	1	0.957377	2.15823	1.23121	0.278716	0.301394	0.907675	0.0158411	0.0345684	0.0203891	15.9227	0.147075	0.158013	0.159464	0.0935446	0.0334293	0.00485022	0.103616	0.331353	1.32735	2.27717	0.0120849	0.0689555	0.365286	0.0362434	3.23728	0.024646	1.4339	0.0171429	0.497303	1.10119	0.930453	0.0415687	0.266159	0.183115	1.94107	0.118512	0.14287	0.0541995	0.0120446	0.202952	0	0.174286	0	0	0	0.0371429	1.49143	6.51429
3 weeks acclimated	2	0.739747	2.78119	1.63755	0.29225	0.260529	0.610248	0.0104992	0.0291819	0.0181815	17.0685	0.151715	0.0813321	0.066214	0.103271	0.0278157	0.00292606	0.0972377	0.333574	1.5647	1.21439	0.00715633	0.0398537	0.326746	0.0362043	2.00833	0	1.30695	0	0.396924	0.822594	0.580479	0.0384252	0.289262	0.191934	1.07545	0.143635	0.1752	0.0675135	0.0224053	0.217759	0	0.16	0	0	0	0.634286	1.54857	9.11429
3 weeks acclimated	3	0.76849	3.0614	0.72852	0.286877	0.336423	0.503355	0.014473	0.0276339	0.0229401	17.2647	0.171727	0.102826	0.0857453	0.0662584	0.0235948	0.00372103	0.141682	0.266079	1.57475	1.91214	0.00575399	0.0665787	0.236667	0.0252727	2.87747	0.0173085	1.28988	0	0.46947	1.10539	0.765374	0.028089	0.357816	0.143828	1.68061	0.0812771	0.0879818	0.0395331	0.0282708	0.149789	0.062	0.148	0	0	0	0.044	2.054	12.462
6 weeks acclimated	1	0.964396	1.02578	0.616081	0.25074	0.152479	1.54352	0.0267531	0.0509758	0.0179373	6.19753	0.207562	0.182543	0.182071	0.11899	0.0398048	0.0156771	0.191013	0.350489	0.883854	2.39322	0.0262907	0.0450343	0.498288	0.0359322	1.43739	0.0260533	1.2911	0.0162568	0.383872	1.18491	0.942969	0.0782063	0.344043	0.147264	3.72476	0.151959	0.176015	0.0698051	0.0190205	0.246591	0	0.1175	0	0	0	0.065	1.0225	5.4275
6 weeks acclimated	2	1.41741	2.73519	0.61497	0.476498	0.372265	2.8743	0.0347355	0.0534877	0.0255965	21.8836	0.194839	0.225773	0.308234	0.0754417	0.0331846	0.0161371	0.191894	0.403073	1.78091	2.49745	0.0206456	0.0698803	0.438331	0.0310889	3.24174	0.0423771	2.23507	0.0339873	0.454521	1.9318	1.57673	0.0620356	0.386769	0.109355	3.41899	0.120687	0.150265	0.0742264	0.0978528	0.222838	0	0.108889	0	0	0	0.0533333	0.873333	4.67556
6 weeks acclimated	3	0.701986	1.49002	0.321298	0.280733	0.226572	1.48318	0.00790049	0.0433432	0.0203271	19.7125	0.20559	0.107259	0.189738	0.0923446	0.0206468	0.0133414	0.112025	0.498532	1.43631	1.71731	0.0120355	0.0528149	0.436822	0.0263152	1.00338	0.0217711	1.537	0.0312615	0.406986	1.19173	0.902494	0.0435927	0.297233	0.104396	2.48545	0.0990959	0.125897	0.0645306	0.086138	0.202122	0	0.094	0	0	0	0.048	1.788	13.162
[truncated: 4 more columns]

## Sheet: Fat body
Treatment	Replicate	Arginine	Glutamine	Serine	Asparagine	Threonine	Alanine	Putrescine	Aspartic acid	Ornithine	Proline	Glutamic acid	Methionine	Histidine	Glutathion (GSH)	Cysteine	Cystathione (CTH)	Tryptophan	Phenylalanin	Tyrosine	Lysine	Fumaric acid	Succinic acid	Lactic acid	Maleic acid	Glycine	Aminobutyric acid	Valine	beta-Alanine	Ketoglutaric acid	Leucine	Isoleucine	Malic acid	Aconitic acid	Myristic acid (C14:0)	Citric acid	Palmitic acid (C16:0)	Stearic acid (C18:0)	Oleic acid (C18:1n9)	Linoleic acid (C18:2n6)	Pyruvic acid	Glycerol	Threitol	Ribose	Ribitol	Fructose	Glucose	chiro-Inositol	scyllo-Inositol
0 weeks control	1	2.52793	0.621099	0.478311	0.153559	0.148688	0.409649	0.01488	0.336566	0.022462	1.62144	0.752382	0.062215	0.16241	0.822442	0.0425281	0.0308638	0.212979	0.196387	1.46782	0.308542	0.0652878	0.0794792	0.852212	0.0806137	0.603365	0	0.210152	0	0.172093	0.193003	0.137247	0.166425	0.0992822	0.529413	0.234381	0.354388	0.454631	0.182996	0.161183	0.447824	0.682256	0.286107	0	0	0	0.583219	0.154058	0
0 weeks control	2	2.5937	0.413763	0.545386	0.138193	0.13127	0.264417	0.0176504	0.214366	0.0260574	2.14086	1.23233	0.0872808	0.130388	1.38052	0.0493687	0.0315657	0.518562	0.553087	3.40431	0.547474	0.0327827	0.0652585	1.06615	0.069822	0.698928	0	0.21903	0	0.199459	0.236068	0.145802	0.115001	0.0921264	0.330248	0.255364	0.24084	0.325953	0.138086	0.158534	0.433321	0.907331	0.237898	0	0	0	0.298755	0.13278	0
0 weeks control	3	4.06932	0.768182	1.0591	0.23309	0.182503	0.398584	0.0203082	0.213076	0.0298405	2.91717	1.79869	0.110242	0.0890586	1.96357	0.0514052	0.0186249	0.733161	0.617572	4.16308	0.745808	0.0501787	0.0757589	0.552865	0.0697521	0.881415	0	0.344274	0	0.205574	0.384031	0.227188	0.132172	0.0771571	0.267498	0.391545	0.219072	0.315793	0.114965	0.0458775	0.380933	0.98377	0.209738	0	0	0	0.54432	0.129838	0
3 weeks control	1	3.47845	0.861556	0.54556	0.149354	0.21746	0.334207	0.0348961	0.28855	0.0241968	4.95884	2.72752	0.0524739	0.172038	3.9603	0.0669094	0.0155482	0.559307	0.249193	1.22632	1.01804	0.0582482	0.114558	1.06063	0.0707514	1.49418	0	0.529677	0.0275285	0.254234	0.321904	0.227716	0.138475	0.13267	0.204207	0.250579	0.237438	0.293401	0.122827	0.0749547	0.356551	1.49247	0.19467	0	0	0	0.417149	0.825029	4.00463
3 weeks control	2	5.33508	0.951612	0.482144	0.148443	0.245004	0.421066	0.0365165	0.165793	0.0355032	4.51773	2.01426	0.108433	0.00443644	1.88526	0.0593227	0.0126377	1.04559	0.867871	4.19306	1.37467	0.0457732	0.0914735	0.959016	0.0536174	1.04984	0	0.598131	0.0221788	0.20264	0.675527	0.454271	0.106007	0.117995	0.226774	0.497359	0.177056	0.228489	0.0868387	0.0322749	0.336905	0.15534	0.123566	0	0	0.180053	1.71933	0.296558	0.257723
3 weeks control	3	1.9573	0.551208	0.235592	0.111163	0.118954	0.364756	0.0317257	0.104901	0.0199375	2.4771	1.18336	0.0693544	0.120555	2.36032	0.0591271	0.0262999	0.504717	0.22358	1.41632	0.781389	0.0495615	0.0666554	0.493278	0.0628032	0.899978	0	0.268768	0.0272841	0.170424	0.226343	0.160555	0.114372	0.070418	0.1553	0.228068	0.214048	0.310959	0.113466	0.0314775	0.344338	0.985885	0.199783	0	0	0	0.230185	0.399566	0.851249
6 weeks control	1	1.74598	1.21346	0.501952	0.138044	0.201791	0.420473	0.0267621	0.0915858	0.0152932	3.28864	1.68814	0.0618687	0.112688	1.13396	0.0449274	0.00274495	0.824144	0.548217	3.67484	0.427663	0.0336513	0.0663943	0.241302	0.0295724	1.13978	0	0.632545	0.0179115	0.181467	0.520052	0.351226	0.0639179	0.113032	0.0643273	0.513189	0.0877004	0.132536	0.0535598	0.0258163	0.199608	0.562646	0.117373	0	0	0	0.350256	0.197485	0.350256
6 weeks control	2	1.09789	0.468102	0.245089	0.0804477	0.148256	0.264887	0.00952473	0.0876091	0.0134899	1.72497	0.839975	0.0595964	0.0627834	1.19838	0.0326621	0.0390894	0.527442	0.215659	1.2872	0.27238	0.0557047	0.0729562	0.37761	0.0367239	0.757619	0	0.266198	0.0344696	0.124366	0.183492	0.145059	0.133785	0.0804272	0.114923	0.287049	0.206874	0.275285	0.155675	0.335118	0.236252	0.718941	0.0977597	0	0	0.431772	2.27902	0.297352	0.307536
6 weeks control	3	2.16898	0.724927	0.333194	0.119197	0.166489	0.362166	0.0232707	0.120981	0.019765	3.19546	1.42448	0.0695051	0.195199	1.19979	0.0462199	0.0037055	0.778218	0.525902	3.68912	0.727275	0.0226518	0.0424774	0.344629	0.0268572	0.814761	0	0.36337	0.0128235	0.14734	0.470764	0.275285	0.057221	0.0780243	0.106372	0.419624	0.0993467	0.144699	0.0620304	0.0393773	0.231476	0.544292	0.10411	0	0	0	0.250228	0.153425	0.0767123
3 weeks acclimated	1	2.45287	1.10923	0.858327	0.144431	0.155732	0.380615	0.0403526	0.130807	0.0264943	7.24635	1.93505	0.0967584	0.0791482	1.23614	0.053227	0.00406107	0.444477	0.506799	2.02207	0.900806	0.020426	0.0262536	1.16325	0.061915	1.44161	0	0.725166	0	0.201551	0.706893	0.444022	0.0816311	0.0568579	0.278001	0.3969	0.309194	0.390904	0.160748	0.0857288	0.36127	0.43	0.215	0	0	0	0	0.475	1.585
3 weeks acclimated	2	3.89407	1.7439	0.765388	0.238484	0.295678	0.471608	0.0488752	0.14076	0.0283583	9.14015	2.94276	0.194368	0.213681	1.59043	0.0549672	0.00774635	0.743239	1.56545	4.55097	1.38997	0.02836	0.0553114	0.611554	0.0575317	1.08842	0	1.08874	0	0.203334	1.53784	0.973114	0.0897559	0.0498541	0.191335	0.373592	0.142498	0.187312	0.0806492	0.0653165	0.405964	0.64877	0.237136	0	0	0	0	0.536913	2.51902
3 weeks acclimated	3	4.16085	1.97069	0.239611	0.25248	0.305577	0.363898	0.0373664	0.13149	0.0425174	13.5134	3.95716	0.118009	0.508344	2.26952	0.0754886	0.00681391	0.854735	0.446246	2.91685	2.49199	0.0246628	0.0461683	0.435902	0.0608754	1.43307	0	0.908075	0	0.27138	1.1859	0.674818	0.0884066	0.03309	0.175665	0.334064	0.123153	0.187874	0.0783423	0.0459156	0.337139	0.76399	0.257908	0	0	0	0	0.80292	4.20925
6 weeks acclimated	1	6.70356	2.36916	0.81064	0.36753	0.498403	1.27381	0.0425291	0.328629	0.0375771	9.90257	3.19255	0.267665	0.490788	1.85288	0.0679404	0.0188804	0.824245	1.10372	4.88181	2.84451	0.0609945	0.0450829	0.997127	0.0733702	1.3074	0	4.08334	0	0.153812	2.45657	1.56994	0.117569	0	0.158106	0.764632	0.247266	0.305995	0.142862	0.0334594	0.343459	0.658564	0.318232	0	0	0	0.41547	0.609945	2.69171
6 weeks acclimated	2	5.07164	2.10048	0.554577	0.328282	0.449178	0.97956	0.05132	0.209047	0.0318244	7.12623	2.53739	0.27332	0.493321	1.53884	0.0517342	0.00741604	0.662036	1.44845	4.32807	2.30097	0.0290562	0.0452943	0.651961	0.043247	1.06252	0	1.6135	0	0.155043	2.40356	1.78728	0.0806496	0.0950884	0.185316	0.416502	0.105161	0.137757	0.0582407	0.0284692	0.361317	0.667206	0.204049	0	0	0	0	0.408097	2.1085
6 weeks acclimated	3	5.46644	1.78996	0.606827	0.343686	0.321784	1.16707	0.0488667	0.312946	0.0459065	16.2571	2.89095	0.17711	0.49674	2.08359	0.0651893	0.0176289	0.683081	1.39324	3.50669	2.37693	0.0445769	0.0364148	0.625323	0.0539866	0.956279	0	1.71549	0.0339579	0.208092	2.05355	1.46145	0.10649	0.158596	0.183474	1.01727	0.18628	0.285958	0.116545	0.0417311	0.333943	0.802198	0.227106	0	0	0	0.124542	1.1978	7.92674
[truncated: 4 more columns]
